# Supplementary material for: Rational design of 2D ferroelectric heterogeneous catalysts for controllable hydrogen evolution reaction
Source: Royal Society of Chemistry journal article supplement (doi:10.1039/d2ta04464a), 2022-01-01
Supplement: d2ta04464a1.pdf [file d2ta04464a1.pdf]

SUPPORTING INFORMATION

# **Rational Design of 2D Ferroelectric Heterogeneous Catalysts for Controllable Hydrogen Evolution Reaction**

Tsz Lok Wan<sup>1#</sup>, Junxian Liu<sup>1#</sup>, Xin Tan<sup>2</sup>, Ting Liao<sup>1</sup>, Yuantong Gu<sup>1</sup>, Aijun Du<sup>3</sup>, Sean Smith<sup>2\*</sup>, Liangzhi Kou<sup>1\*</sup>

<sup>1</sup> School of Mechanical, Medical and Process Engineering Faculty, Queensland University of Technology, Brisbane, QLD, Australia.

<sup>2</sup> Integrated Materials Design Laboratory, Department of Applied Mathematics, Research School of Physics, The Australian National University, Canberra, Australian Capital Territory, Australia.

<sup>3</sup> School of Chemistry and Physics, Queensland University of Technology, Brisbane, QLD, Australia.

# The authors made the equal contributions.

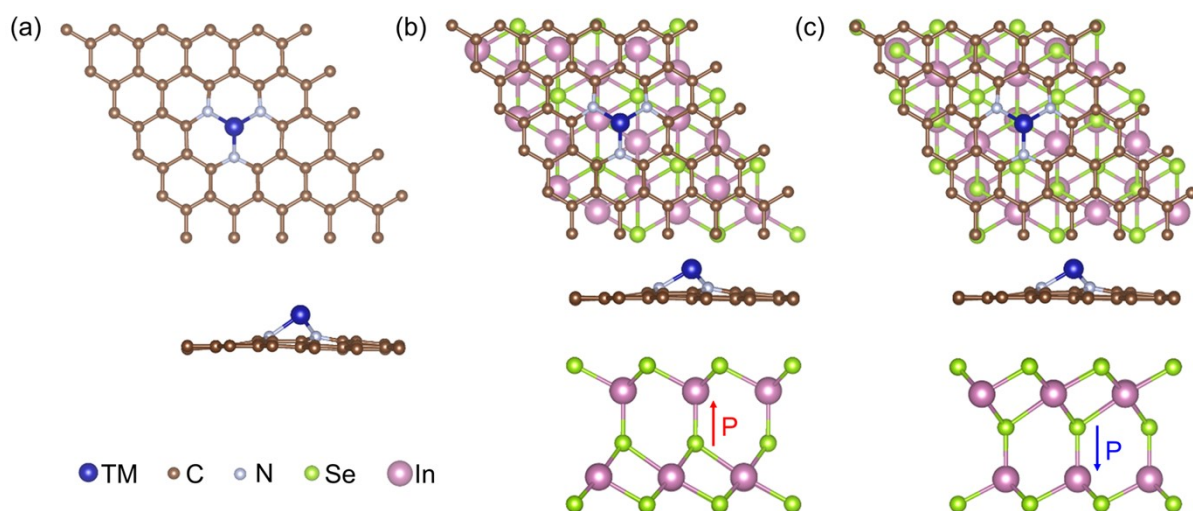

Fig. S1 Top and side views of the optimized structures for (a) TMN<sub>3</sub>, (b) TMN<sub>3</sub>/P<sup>↑</sup>-In<sub>2</sub>Se<sub>3</sub>, and (c) TMN<sub>3</sub>/P<sup>↓</sup>-In<sub>2</sub>Se<sub>3</sub>.

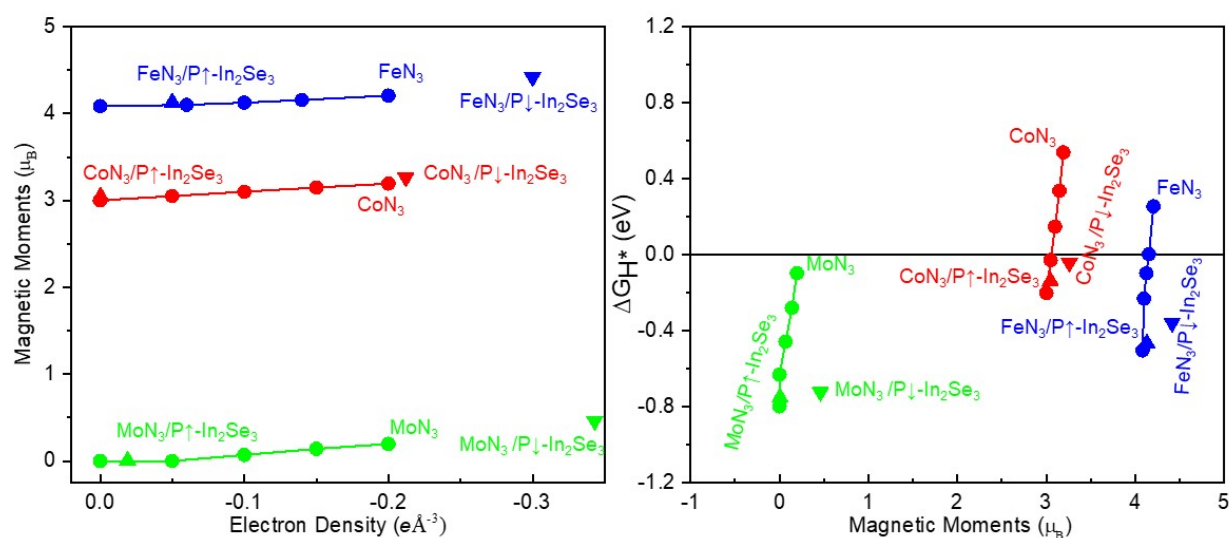

Fig. S2 Relationships between the (a) magnetic moment and electron density and (b) Gibbs free energy of  $\Delta G_{H^*}$  and magnetic moment of TMN<sub>3</sub> and TMN<sub>3</sub>/In<sub>2</sub>Se<sub>3</sub> catalysts.

Fig. S2a shows the inverse relationship between the magnetic moment of TMN<sub>3</sub>-H\* and the different electron densities. It is found that the electron density can influence the magnetic moment of TMN<sub>3</sub>-H\*. On the other hand, the notable deviations from the linear trend between magnetic moment and electron density of TMN<sub>3</sub>/P<sup>↑</sup>-In<sub>2</sub>Se<sub>3</sub> and TMN<sub>3</sub>/P<sup>↓</sup>-In<sub>2</sub>Se<sub>3</sub> can be also observed. It can be attributed to the electrostatic potential difference after introducing the FE substrate and the intrinsic polarization of In<sub>2</sub>Se<sub>3</sub>, which is partially responsible for the variation of the magnetic moment. As shown in Fig. S2b, the larger magnetic moment adjusts the catalytic activity of TM sites, resulting in weaker adsorption of the H atom on the TMN<sub>3</sub>

catalyst, ascribed to the adjustment of empty and occupied d-orbitals of TM atoms. Further analysis can be seen in Fig. 1c-e, 2b, and S4.

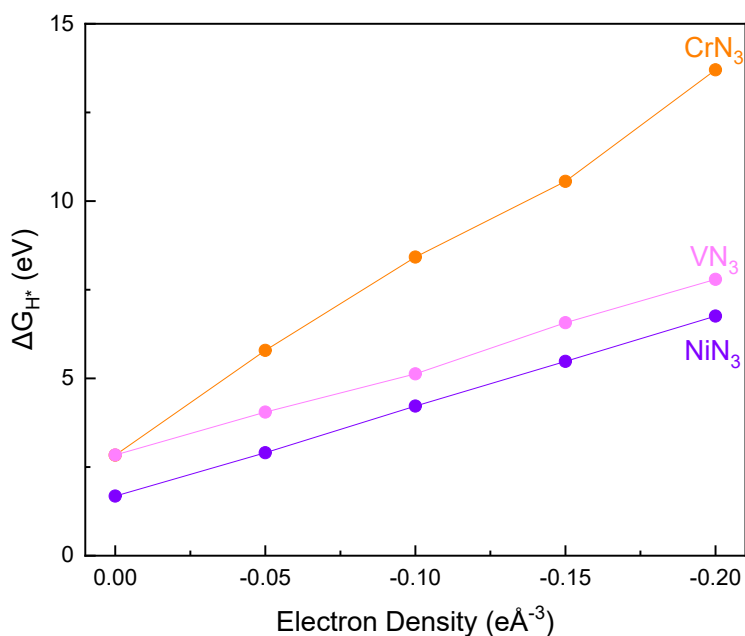

Fig. S3 Relationships between the Gibbs free energy of  $\Delta G_{H^*}$  and electron density of other TMN<sub>3</sub> catalysts.

One can see clearly from Fig. S3 that a linear relationship between the electron density and  $\Delta G_{H^*}$  for other studied TMN<sub>3</sub> catalysts (TM = Cr, Ni, and V), indicates electron density is an effective factor to modulate the HER performance. However, these three TMN<sub>3</sub> catalysts show weak HER activity, thus, we neglect these TMN<sub>3</sub> catalysts in the following discussion.

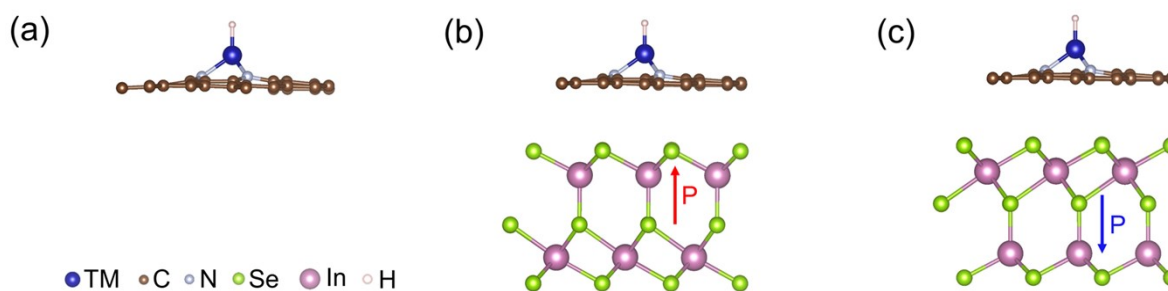

Fig. S4 Side views of the optimized structures for (a) TMN<sub>3</sub>-H\*, (b) TMN<sub>3</sub>/P<sup>↑</sup>-In<sub>2</sub>Se<sub>3</sub>-H\*, and (c) TMN<sub>3</sub>/P<sup>↓</sup>-In<sub>2</sub>Se<sub>3</sub>-H\*.

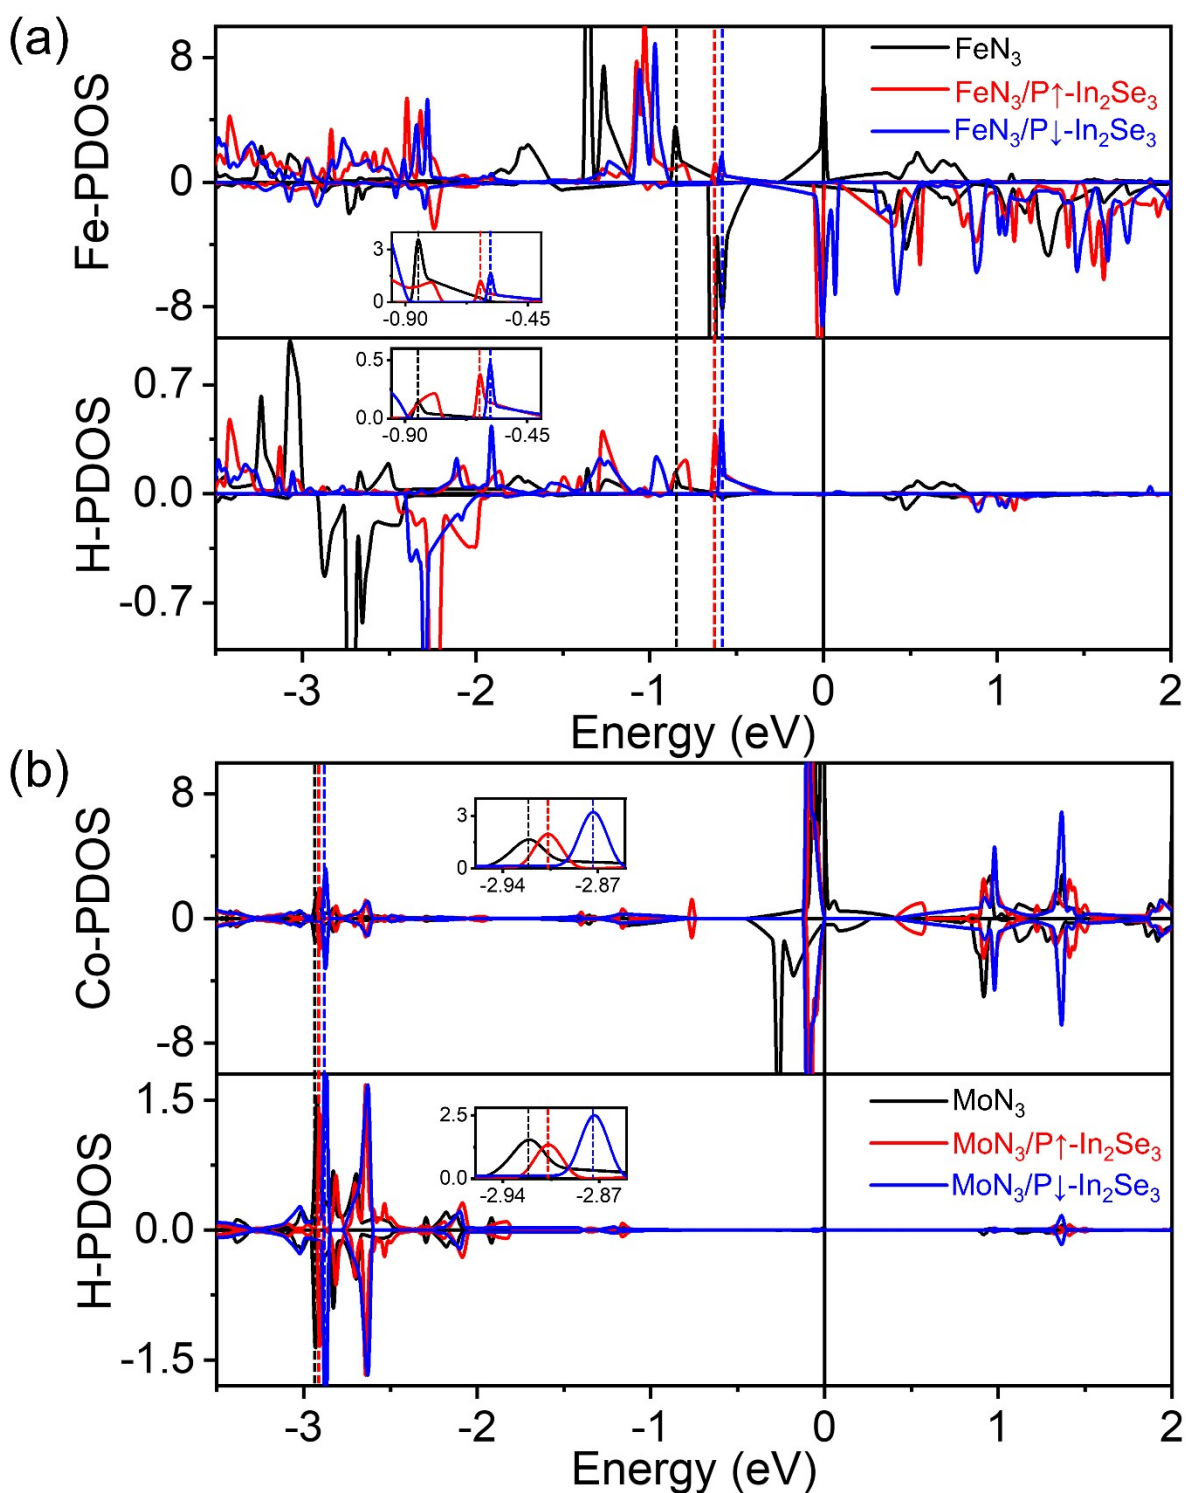

Fig. S5 PDOSs of TM-d and H-s orbitals for TMN<sub>3</sub> and TMN<sub>3</sub>/In<sub>2</sub>Se<sub>3</sub> with different polarization directions: (a) FeN<sub>3</sub> and (b) MoN<sub>3</sub>.

From Fig. S5, we can see the PDOS for Fe/Mo-d and H-s orbitals of pure TMN<sub>3</sub> and TMN<sub>3</sub>/In<sub>2</sub>Se<sub>3</sub> are plotted in Fig. S4. One we can see the obvious shift of Fe/Mo–H bonding state when Fe/MoN<sub>3</sub> is placed on the In<sub>2</sub>Se<sub>3</sub> with two different polarization directions, and it agrees with the changes of  $\Delta G_{H^*}$  values.

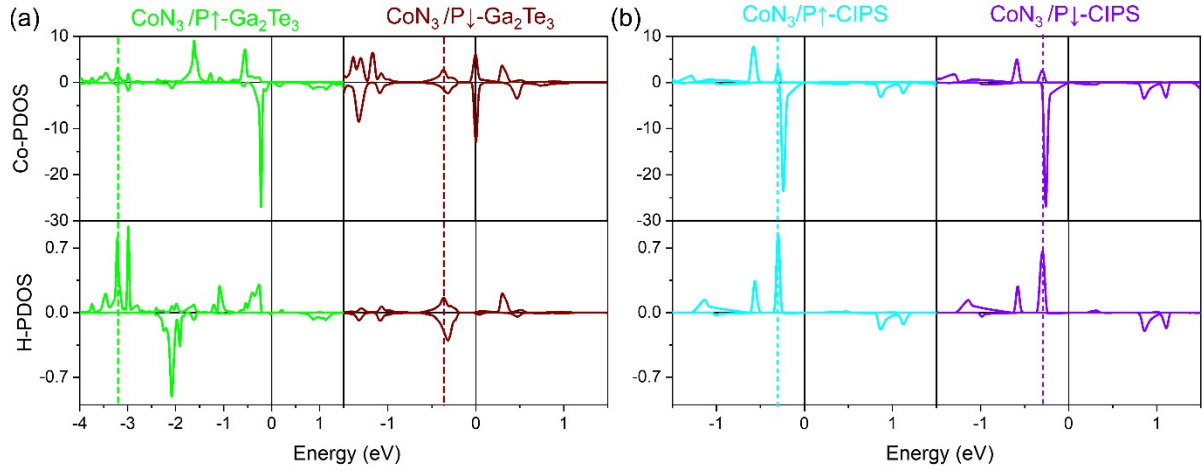

Fig. S6 PDOSs plot for (a)  $\text{CoN}_3/\text{Ga}_2\text{Te}_3$  and (b)  $\text{CoN}_3/\text{CIPS}$  with different polarization directions.

Fig. S6 shows the PDOS for Co-d and H-s orbitals of  $\text{CoN}_3/\text{Ga}_2\text{Te}_3$  and  $\text{CoN}_3/\text{CIPS}$  with two different polarization directions. In Fig S6a, when Co/MoN<sub>3</sub> is placed on the P<sup>↑</sup>-Ga<sub>2</sub>Te<sub>3</sub>, the overlap between the Co-d and H-s orbitals is located at the deep level, demonstrating the relatively high bonding interaction between the Co and H atoms. In contrast, the hybridization between the Co-d and H-s orbitals moves towards the Fermi level when the polarization direction of Ga<sub>2</sub>Te<sub>3</sub> points down, indicating the weak chemical binding of Co-H bond.

As provided in Fig. S6b, one can see clearly that the PDOS of Co-d and H-s orbitals remains essentially unchanged in both polarization directions of CIPS, leading to the feeble changes of the magnetic moment and electron transfer. The phenomenon can be attributed to CIPS is a layered ferroelectric which has a relatively weak van der Waals interaction between the catalyst/substrate interface, leading to a weak response to the polarization switching.

**Table S1.** The H adsorptions on the pure TMN<sub>3</sub> and TMN<sub>3</sub>/In<sub>2</sub>Se<sub>3</sub>: Gibbs free energy change of H\* intermediate ( $\Delta G_{\text{H}^*}$  in eV), total magnetic moment of TMN<sub>3</sub> (M in  $\mu_{\text{B}}$ ), electron transfer of TM atoms ( $Q_{\text{TM}}$  in e/atom), N atoms ( $Q_{\text{N}}$  in e/unit cell), In<sub>2</sub>Se<sub>3</sub> substrate ( $Q_{\text{In}_2\text{Se}_3}$  in e/unit cell), and H atoms ( $Q_{\text{H}}$  in e/atom).

| System                                                            | $\Delta G_{\text{H}^*}$ | M    | $Q_{\text{TM}}$ | $Q_{\text{N}}$ | $Q_{\text{In}_2\text{Se}_3}$ | $Q_{\text{H}}$ |
|-------------------------------------------------------------------|-------------------------|------|-----------------|----------------|------------------------------|----------------|
| FeN <sub>3</sub>                                                  | -0.504                  | 4.08 | -1.09           | 3.68           | N/A                          | 0.45           |
| FeN <sub>3</sub> /P <sup>↑</sup> -In <sub>2</sub> Se <sub>3</sub> | -0.465                  | 4.13 | -1.09           | 3.69           | 0.05                         | 0.44           |
| FeN <sub>3</sub> /P <sup>↓</sup> -In <sub>2</sub> Se <sub>3</sub> | -0.360                  | 4.42 | -1.13           | 3.719          | 0.30                         | 0.41           |
| MoN <sub>3</sub>                                                  | -0.798                  | 0.00 | -1.43           | 3.459          | N/A                          | 0.45           |
| MoN <sub>3</sub> /P <sup>↑</sup> -In <sub>2</sub> Se <sub>3</sub> | -0.751                  | 0.00 | -1.43           | 3.46           | 0.02                         | 0.43           |
| MoN <sub>3</sub> /P <sup>↓</sup> -In <sub>2</sub> Se <sub>3</sub> | -0.723                  | 0.46 | -1.42           | 3.48           | 0.34                         | 0.43           |

**Table S2.** Gibbs free energy change of H\* intermediate ( $\Delta G_{H^*}$  in eV) for pure TMN<sub>3</sub>.

| System           | $\Delta G_{H^*}$ |
|------------------|------------------|
| CrN <sub>3</sub> | 2.836            |
| NiN <sub>3</sub> | 1.680            |
| VN <sub>3</sub>  | 2.840            |

**Table S3.** The magnetic moment of the catalytic TM sites and the surrounding atoms under the different electron doping.

| Electro<br>n<br>Doping | CoN <sub>3</sub> |      |      |      |            | FeN <sub>3</sub> |      |      |      |            | MoN <sub>3</sub> |      |      |      |            |
|------------------------|------------------|------|------|------|------------|------------------|------|------|------|------------|------------------|------|------|------|------------|
|                        | Co               | N    | C    | H    | Total<br>I | Fe               | N    | C    | H    | Total<br>I | Mo               | N    | C    | H    | Total<br>I |
| 0                      | 2.30             | 0.09 | 0.01 | 0.02 | 3.00       | 3.44             | 0.08 | 0.01 | 0.00 | 4.08       | 0.00             | 0.00 | 0.00 | 0.00 | 0.00       |
| -0.05                  | 2.31             | 0.10 | 0.01 | 0.02 | 3.05       | 3.49             | 0.08 | 0.01 | 0.00 | 4.10       | 0.00             | 0.00 | 0.00 | 0.00 | 0.00       |
| -0.1                   | 2.33             | 0.10 | 0.01 | 0.02 | 3.10       | 3.49             | 0.08 | 0.01 | 0.00 | 4.13       | 0.11             | 0.00 | 0.00 | 0.00 | 0.07       |
| -0.15                  | 2.34             | 0.10 | 0.01 | 0.02 | 3.15       | 3.50             | 0.09 | 0.01 | 0.00 | 4.16       | 0.22             | 0.01 | 0.00 | 0.00 | 0.14       |
| -0.2                   | 2.36             | 0.10 | 0.01 | 0.02 | 3.19       | 3.51             | 0.09 | 0.00 | 0.00 | 4.21       | 0.31             | 0.01 | 0.00 | 0.00 | 0.20       |

**Table S4.** The magnetic moment of the catalytic TM sites and the surrounding atoms before and after absorbed H atom. The values in brackets denote the magnetic moment after absorbed H atom.

| System |       | TMN <sub>3</sub> | TMN <sub>3</sub> /P $\uparrow$ -In <sub>2</sub> Se <sub>3</sub> | TMN <sub>3</sub> /P $\downarrow$ -In <sub>2</sub> Se <sub>3</sub> |
|--------|-------|------------------|-----------------------------------------------------------------|-------------------------------------------------------------------|
| Co     | Co    | 1.90<br>(2.30)   | 1.94<br>(2.30)                                                  | 2.00<br>(2.30)                                                    |
|        | N     | 0.07<br>(0.09)   | 0.07<br>(0.09)                                                  | 0.09<br>(0.10)                                                    |
|        | C     | 0.01<br>(0.01)   | 0.00<br>(0.01)                                                  | 0.00<br>(0.00)                                                    |
|        | H     | N/A<br>(0.02)    | N/A<br>(0.02)                                                   | N/A<br>(0.02)                                                     |
|        | Total | 2.29<br>(3.00)   | 2.33<br>(3.01)                                                  | 2.49<br>(3.26)                                                    |
|        | Fe    | Fe               | 3.01<br>(3.44)                                                  | 3.04<br>(3.48)                                                    |
| Fe     | N     | 0.05<br>(0.08)   | 0.06<br>(0.09)                                                  | 0.07<br>(0.09)                                                    |
|        | C     | 0.01<br>(0.01)   | 0.00<br>(0.01)                                                  | 0.00<br>(0.00)                                                    |
|        | H     | N/A<br>(0.00)    | N/A<br>(0.00)                                                   | N/A<br>(0.00)                                                     |
|        | Total | 3.19<br>(4.08)   | 3.27<br>(4.13)                                                  | 3.50<br>(4.42)                                                    |
|        | Mo    | Mo               | 1.18<br>(0.00)                                                  | 1.32<br>(0.00)                                                    |
| Mo     | N     | 0.02<br>(0.00)   | 0.02<br>(0.00)                                                  | 0.02<br>(0.01)                                                    |
|        | C     | 0.01<br>(0.00)   | 0.00<br>(0.00)                                                  | 0.00<br>(0.00)                                                    |
|        | H     | N/A<br>(0.00)    | N/A<br>(0.00)                                                   | N/A<br>(0.00)                                                     |
|        | Total | 1.02             | 1.13                                                            | 1.53                                                              |

---

(0.00)

(0.00)

(0.46)
